# Supplementary material for: Direct transposition of native DNA for sensitive multimodal single-molecule sequencing
Source: PubMed Central journal article supplement (PMC11176058; doi:10.1038/s41588-024-01748-0), 2024-05-09
Supplement: 41588_2024_1748_MOESM8_ESM.pdf [file 41588_2024_1748_MOESM8_ESM.pdf]

## Source Data for Fig. 1b

pmol Tn5 monomer → M 0 37°C 9.4 4.7 2.4 1.18 0.59 0.29 0.15 0.075 E 55°C 9.4 4.7 2.4 1.18 0.59 0.29 0.15 0.075 M

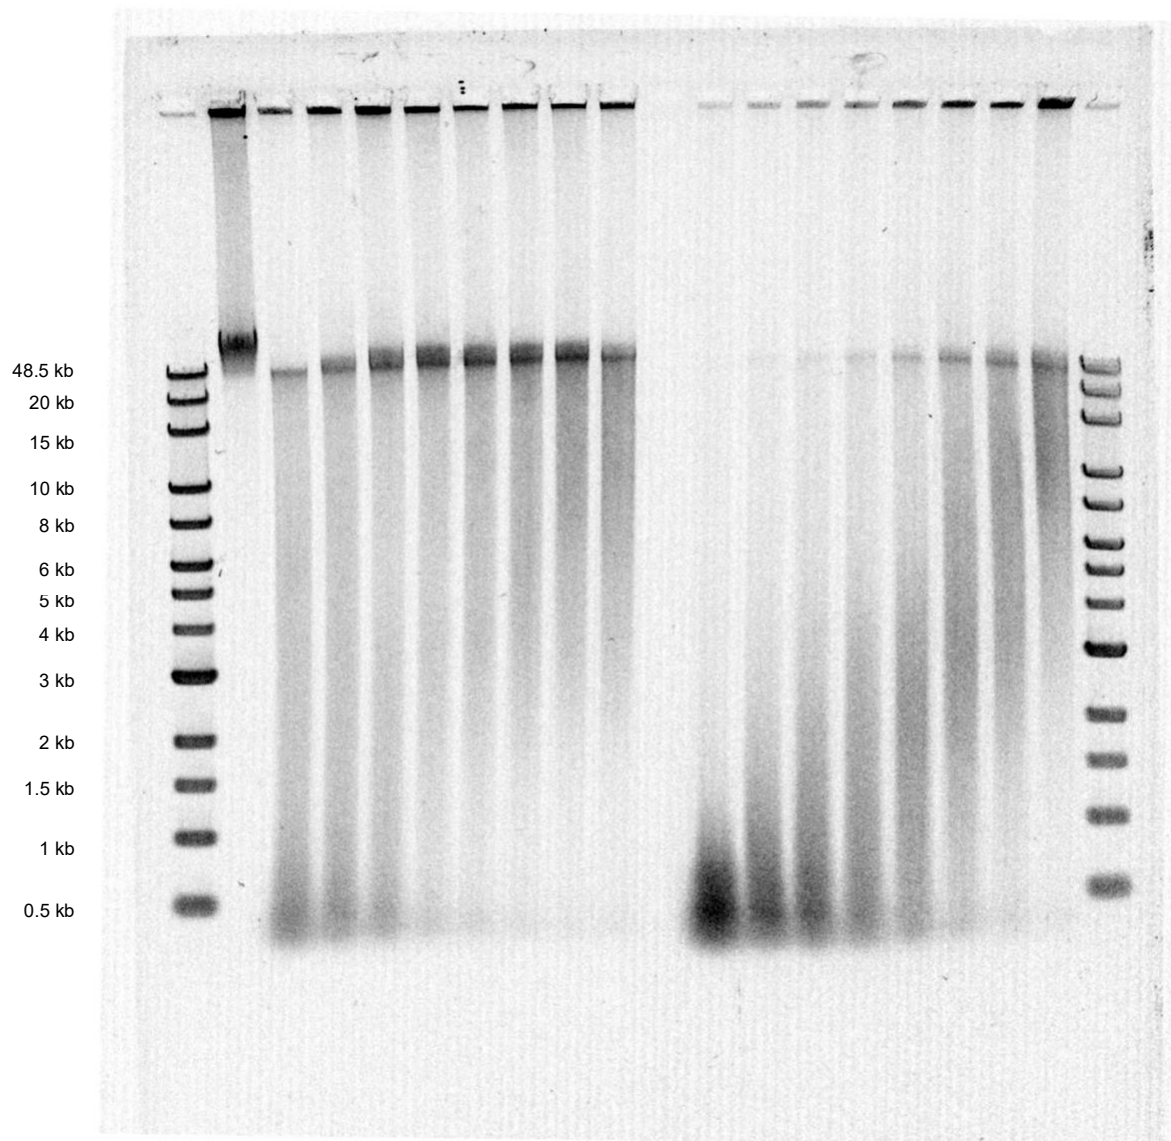

Tagmentation duration: 30 minutes.

M = Marker, E = Empty.

0.5% (w/v) TAE/agarose gel stained with SYBR gold and imaged on LI-COR Odyssey FX scanner.
